# Supplementary material for: Stressful Life Events and Chronic Fatigue Among Chinese Government Employees: A Population-Based Cohort Study
Source: Frontiers journal article supplement (doi:10.3389/fpubh.2022.890604), 2022-07-07
Supplement: Data_Sheet_1.PDF [file Data_Sheet_1.PDF]

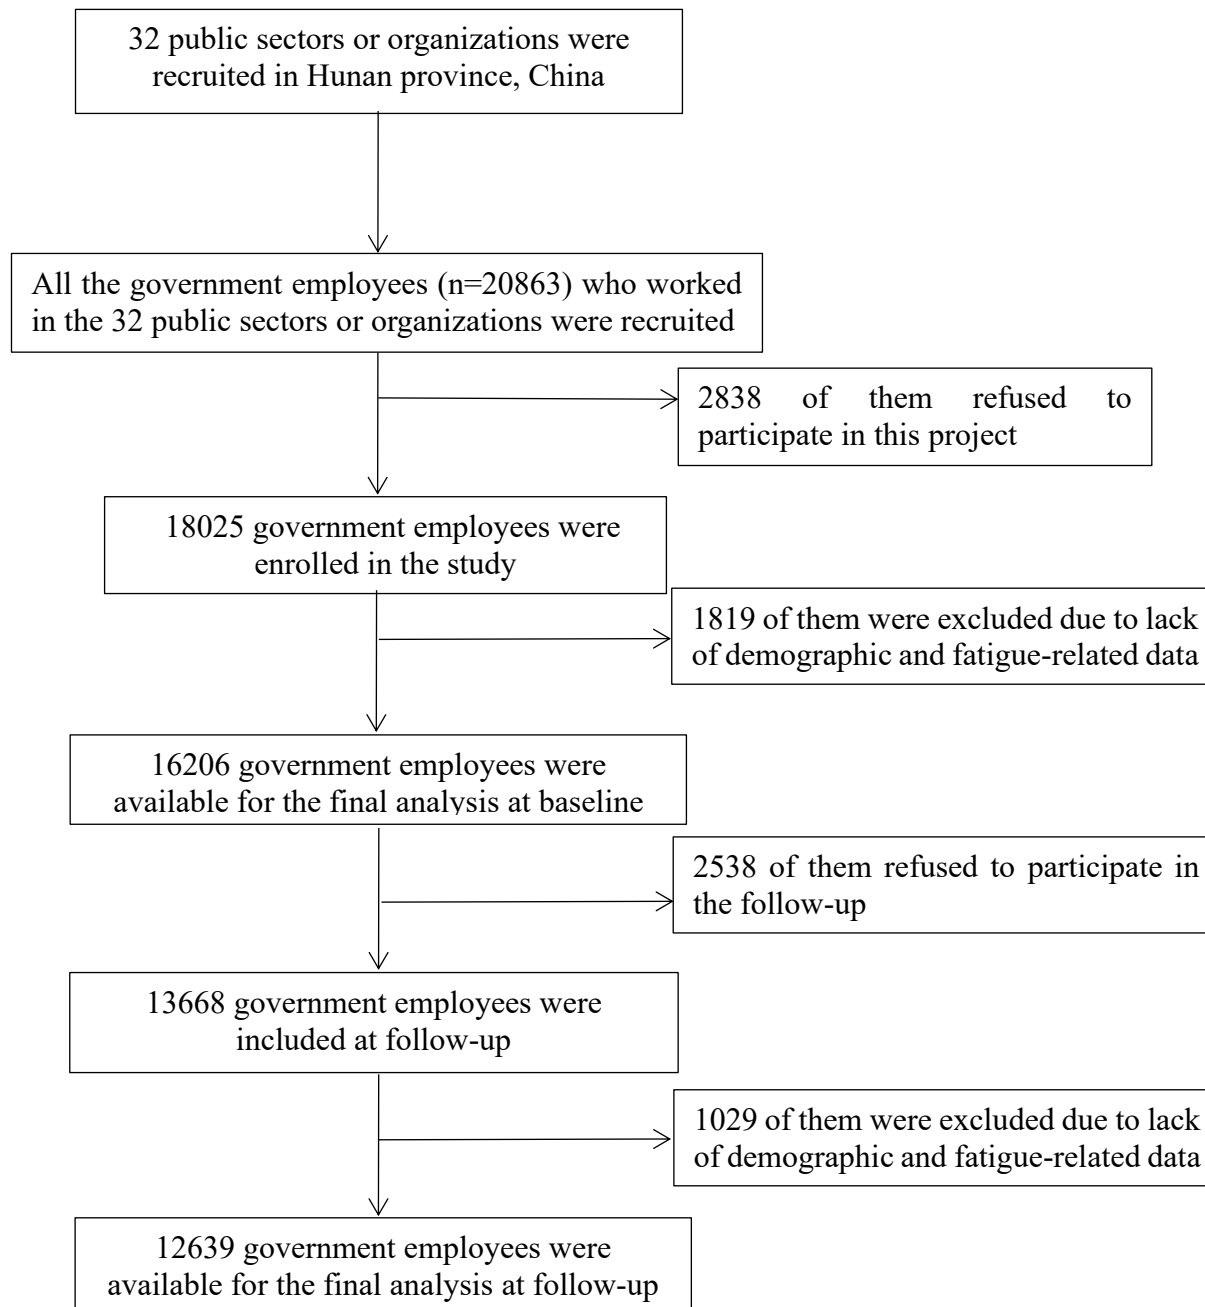

**Fig. S1 Inclusion process for the participants**

**Table S1 Baseline characteristics of positive and negative life events**

| Nature of the life events   | Item                                              | N           | %           | Rank of prevalence |
|-----------------------------|---------------------------------------------------|-------------|-------------|--------------------|
| <b>Positive life events</b> |                                                   | <b>7110</b> | <b>43.9</b> |                    |
|                             | Pregnancy or wife pregnancy                       | 2226        | 13.7        | 3                  |
|                             | In love or engagement                             | 2178        | 13.4        | 4                  |
|                             | Add new members to the family                     | 2067        | 12.8        | 5                  |
|                             | The economic situation has improved significantly | 1420        | 8.8         | 10                 |
|                             | Promotion                                         | 1236        | 7.6         | 14                 |
|                             | Get married                                       | 998         | 6.2         | 18                 |
|                             | Marital relationship becomes better               | 975         | 6.0         | 19                 |
|                             | start working                                     | 783         | 4.8         | 23                 |
|                             | Outstanding personal achievement                  | 667         | 4.1         | 26                 |
| <b>Negative life events</b> |                                                   | <b>9797</b> | <b>60.5</b> |                    |
|                             | Work stress                                       | 4469        | 27.6        | 1                  |
|                             | Not satisfied with the current job                | 2370        | 14.6        | 2                  |
|                             | In debt                                           | 1856        | 11.5        | 6                  |
|                             | Discord with spouse's parents                     | 1844        | 11.4        | 7                  |
|                             | Separation from spouse due to work demands        | 1704        | 10.5        | 8                  |
|                             | Bad relationship between spouse                   | 1567        | 9.7         | 9                  |
|                             | Unsatisfied sex life                              | 1345        | 8.3         | 11                 |
|                             | Difficulties in child discipline                  | 1313        | 8.1         | 12                 |
|                             | Misunderstood, blamed, false accusation, argument | 1269        | 7.8         | 13                 |
|                             | Family financial difficulties                     | 1231        | 7.6         | 15                 |
|                             | Life style changes                                | 1207        | 7.4         | 16                 |

|  |                                                  |      |     |    |
|--|--------------------------------------------------|------|-----|----|
|  | Deduction of bonuses and fines                   | 1066 | 6.6 | 17 |
|  | Family member seriously ill/ injured             | 957  | 5.9 | 20 |
|  | poor relationship with superiors                 | 875  | 5.4 | 21 |
|  | Broken love                                      | 831  | 5.1 | 22 |
|  | Miscarriage by yourself or wife                  | 689  | 4.3 | 24 |
|  | Death of family member                           | 672  | 4.1 | 25 |
|  | Parental discord                                 | 644  | 4.0 | 27 |
|  | Housing shortage                                 | 587  | 3.6 | 28 |
|  | Husband and wife separated due to discord        | 508  | 3.1 | 29 |
|  | Children leave home for a long time              | 418  | 2.6 | 30 |
|  | Discord with colleagues                          | 363  | 2.2 | 31 |
|  | Go abroad for the first time                     | 361  | 2.2 | 32 |
|  | Theft, property damage                           | 328  | 2.0 | 33 |
|  | Friend died                                      | 280  | 1.7 | 34 |
|  | Friends seriously ill/ injured                   | 267  | 1.6 | 35 |
|  | divorce                                          | 266  | 1.6 | 36 |
|  | Unexpected frights, accidents, natural disasters | 233  | 1.4 | 38 |
|  | Intervene in civil legal disputes                | 238  | 1.5 | 37 |
|  | Failure of children's advancement or employment  | 214  | 1.3 | 39 |
|  | Self seriously ill/injured                       | 209  | 1.3 | 40 |
|  | Unemployed                                       | 186  | 1.1 | 41 |
|  | spouse has an affair                             | 156  | 1.0 | 42 |
|  | yourself or your spouse undergo sterilization    | 142  | 0.9 | 43 |
|  | retired or did not arrange a specific job        | 132  | 0.8 | 44 |
|  | examination failed                               | 68   | 0.4 | 45 |
|  | Detained, tried                                  | 55   | 0.3 | 46 |
|  | Death of spouse                                  | 55   | 0.3 | 47 |

|  |                               |    |     |    |
|--|-------------------------------|----|-----|----|
|  | Violation of one child policy | 48 | 0.3 | 48 |
|--|-------------------------------|----|-----|----|

**Table S2 Baseline characteristics of different types of life events**

| Type of life events                            | Item                                            | N           | %           |
|------------------------------------------------|-------------------------------------------------|-------------|-------------|
| <b>Events related to family &amp; marriage</b> |                                                 | <b>9070</b> | <b>56.0</b> |
|                                                | In love or engagement                           | 2178        | 13.4        |
|                                                | Broken love                                     | 831         | 5.1         |
|                                                | Get married                                     | 998         | 6.2         |
|                                                | Pregnancy or wife pregnancy                     | 2226        | 13.7        |
|                                                | Miscarriage by yourself or wife                 | 689         | 4.3         |
|                                                | Add new members to the family                   | 2067        | 12.8        |
|                                                | Discord with spouse's parents                   | 1844        | 11.4        |
|                                                | Bad relationship between spouse                 | 1567        | 9.7         |
|                                                | Husband and wife separated due to discord       | 508         | 3.1         |
|                                                | Unsatisfied sex life                            | 1345        | 8.3         |
|                                                | Separation from spouse due to work demands      | 1704        | 10.5        |
|                                                | Spouse has an affair                            | 156         | 1.0         |
|                                                | Marital relationship becomes better             | 975         | 6.0         |
|                                                | Violation of one child policy                   | 48          | 0.3         |
|                                                | Yourself or your spouse undergo sterilization   | 142         | 0.9         |
|                                                | Death of spouse                                 | 55          | 0.3         |
|                                                | Divorce                                         | 266         | 1.6         |
|                                                | Failure of children's advancement or employment | 214         | 1.3         |
|                                                | Difficulties in child discipline                | 1313        | 8.1         |
|                                                | Children leave home for a long time             | 418         | 2.6         |
|                                                | Parental discord                                | 644         | 4.0         |
|                                                | Family member seriously ill/ injured            | 957         | 5.9         |

|                                                       |                                                   |             |             |
|-------------------------------------------------------|---------------------------------------------------|-------------|-------------|
|                                                       | Death of family member                            | 672         | 4.1         |
|                                                       | Go abroad for the first time                      | 361         | 2.2         |
|                                                       | Friends seriously ill/ injured                    | 267         | 1.6         |
|                                                       | Friend died                                       | 280         | 1.7         |
| <b>Events related to work</b>                         |                                                   | <b>6628</b> | <b>40.9</b> |
|                                                       | Unemployed                                        | 186         | 1.1         |
|                                                       | Start working                                     | 783         | 4.8         |
|                                                       | Deduction of bonuses and fines                    | 1066        | 6.6         |
|                                                       | Outstanding personal achievement                  | 667         | 4.1         |
|                                                       | Promotion                                         | 1236        | 7.6         |
|                                                       | Job dissatisfaction                               | 2370        | 14.6        |
|                                                       | Work stress                                       | 4469        | 27.6        |
|                                                       | Poor relationship with superiors                  | 875         | 5.4         |
|                                                       | Discord with colleagues                           | 363         | 2.2         |
|                                                       | Retired or did not arrange a specific job         | 132         | 0.8         |
|                                                       | Examination failed                                | 68          | 0.4         |
| <b>Events related to economic problems</b>            |                                                   | <b>3509</b> | <b>21.7</b> |
|                                                       | Family financial difficulties                     | 1231        | 7.6         |
|                                                       | In debt                                           | 1856        | 11.5        |
|                                                       | The economic situation has improved significantly | 1420        | 8.8         |
|                                                       | Housing shortage                                  | 587         | 3.6         |
| <b>Events related to accidents and legal disputes</b> |                                                   | <b>1726</b> | <b>10.7</b> |
|                                                       | Misunderstood, blamed, false accusation, argument | 1269        | 7.8         |
|                                                       | Theft, property damage                            | 328         | 2.0         |
|                                                       | Unexpected frights, accidents, natural disasters  | 233         | 1.4         |
|                                                       | Intervene in civil legal disputes                 | 238         | 1.5         |
|                                                       | Detained, tried                                   | 55          | 0.3         |
| <b>Events related to health</b>                       |                                                   | <b>1358</b> | <b>8.4</b>  |

|  |                            |      |     |
|--|----------------------------|------|-----|
|  | Lifestyle changes          | 1207 | 7.4 |
|  | Self seriously ill/injured | 209  | 1.3 |

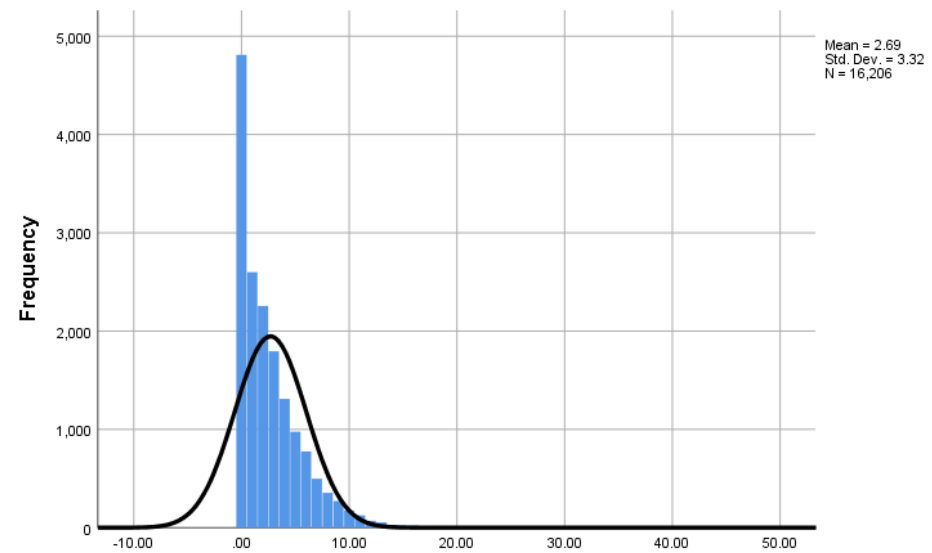

**Fig S2 Frequency distribution of number of life events at baseline**

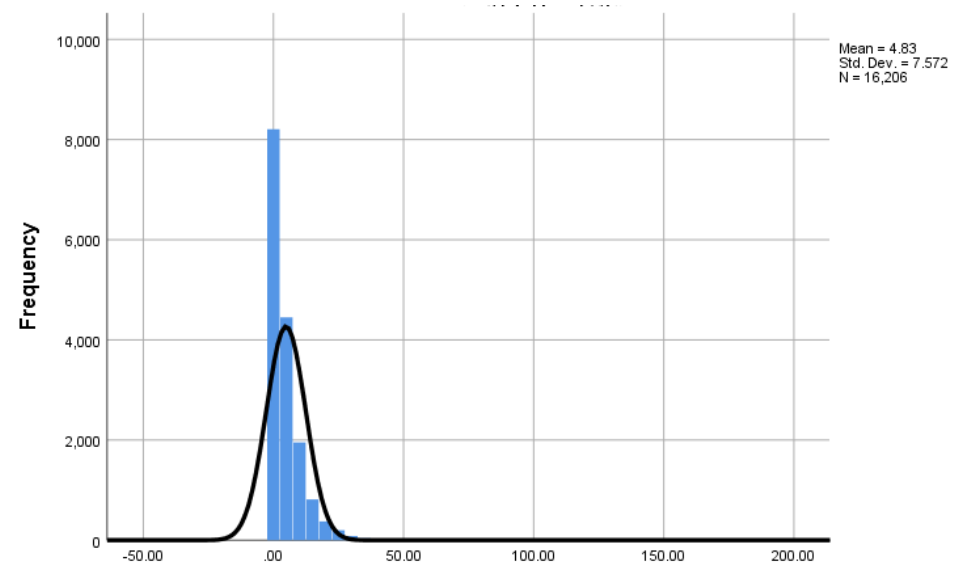

**Fig S3** Frequency distribution of score of life events at baseline

Table S3 Adjusted odds ratios of self-reported fatigue for life events stratified by gender and age in the fully adjusted model <sup>a</sup>

| Work-related life events         | Gender             |                    | Age                |                    |                    |                   |
|----------------------------------|--------------------|--------------------|--------------------|--------------------|--------------------|-------------------|
|                                  | Female             | Male               | 18-30              | 31-40              | 41-50              | ≥51               |
| Unemployed                       | 1.07(0.80 - 2.54)  | 0.74(0.25 - 2.13)  | 0.93(0.73 - 1.99)  | 1.19(0.35 - 2.57)  | 0.96(0.25 - 3.61)  | 0.74(0.37 - 6.47) |
| Start working                    | 1.19(0.56 - 1.18)  | 0.52(0.27 - 1.01)  | 1.23(0.77 - 1.93)  | 0.87(0.31 - 2.44)  | 0.44(0.10 - 1.96)  | 0.54(0.33 - 3.20) |
| Failed in exam                   | 0.61(0.22 - 1.99)  | 1.69(0.46 - 6.23)  | 0.88(0.40 - 1.94)  | 0.20(0.03 - 1.03)  | 1.80(0.94 - 9.37)  | 0.62(0.09 - 2.23) |
| Deduction of bonuses and fines   | 0.97(0.76 - 1.24)  | 1.93*(1.17 - 3.16) | 1.82*(1.22 - 2.70) | 1.87*(1.25 - 2.78) | 1.79(0.96 - 3.34)  | 2.99(1.00 - 8.17) |
| Outstanding personal achievement | 0.80(0.72 - 1.58)  | 1.00(0.50 - 1.96)  | 1.67(0.82 - 3.36)  | 0.65(0.80 - 1.33)  | 0.51(0.14 - 1.91)  | 1.57(0.56 - 4.37) |
| Promotion                        | 0.90(0.74 - 1.26)  | 1.03(0.57 - 1.86)  | 1.09(0.62 - 1.91)  | 0.75(0.47 - 1.20)  | 1.48(0.72 - 3.06)  | 1.25(0.48 - 3.28) |
| Job dissatisfaction              | 1.65*(1.49 - 2.08) | 1.80*(1.14 - 1.91) | 1.64*(1.14 - 2.36) | 1.50*(1.05 - 2.12) | 2.47*(1.45 - 4.20) | 1.99(0.69 - 5.76) |
| Work stress                      | 1.66*(1.25 - 2.24) | 1.48*(1.01 - 2.21) | 1.48*(1.05 - 2.09) | 1.62*(1.19 - 2.19) | 1.80*(1.12 - 2.88) | 1.81(0.78 - 4.21) |
| Bad relationship with superiors  | 0.97(0.75 - 1.26)  | 0.89(0.46 - 1.73)  | 0.82(0.46 - 1.46)  | 0.78(0.64 - 1.22)  | 0.83(0.49 - 1.40)  | 1.70(0.66 - 4.37) |
| Discord with colleagues          | 3.80*(2.56 - 5.23) | 3.34*(1.62 - 6.92) | 1.94*(1.01 - 3.97) | 4.98*(2.95 - 8.35) | 3.10(1.45 - 6.61)  | 2.98(0.79 - 7.63) |
| Retired                          | 0.83(0.43 - 1.97)  | 1.54(0.55 - 4.26)  | 1.05(0.58 - 1.89)  | 2.08(0.99 - 4.62)  | 1.30(0.29 - 5.70)  | 0.48(0.13 - 1.82) |

Without any life events provided as the reference group; \*p < 0.05

Abbreviations: CI, confidence interval; OR, odds ratio.

<sup>a</sup> The fully adjusted model adjusted for age, gender, marital status, education level, family income, grades of employment, type of work, work hours per day, sleep quality, whether have chronic disease, smoking, drinking and attending business dinner frequently or not.



### Analytic plan

Data analyses were conducted by SPSS 26.0. All p-values refer to two-tailed tests. A p-value less than 0.05 was considered statistically significant.

The mean and standard deviation (SD) or proportion (%) of covariate characteristics were presented among participants with or without self-reported fatigue. Chi-square tests were used for categorical variables.

Logistic regression models were used to estimate ORs and corresponding 95% confidence intervals (CIs) of self-reported fatigue for different type of stressful life events. In the logistic regression models, each model included known and potential confounders. Model 1 adjusted for gender and age. Model 2 further adjusted for baseline social demographic factors (including marital status, education level, family income, grades of employment, type of work, work hours per day, sleep quality and whether have illness) and model 3 further included behavioral factors (including smoking, drinking and attending business dinner frequently or not). Specifically, we conducted seven different analyses (a-g), see Table S5 for the details.

To examine associations of worked-related stress and self-reported fatigue in different participants, analyses were explored across subgroups stratified by gender and age. In addition to covariates, 11 work-related variables were put into the model at the same time in different models.

**Table S4 Details of variables controlled by different models**

| <b>Data Analysis</b>                                                                          | <b>Model 1</b>                                                                                            | <b>Model 2</b>                                                                                                                                                                                                                                           | <b>Model 3</b>                                                                                                                                                                                                                                                                                                            |
|-----------------------------------------------------------------------------------------------|-----------------------------------------------------------------------------------------------------------|----------------------------------------------------------------------------------------------------------------------------------------------------------------------------------------------------------------------------------------------------------|---------------------------------------------------------------------------------------------------------------------------------------------------------------------------------------------------------------------------------------------------------------------------------------------------------------------------|
| <b>a) The associations between cumulative number of life events and self-reported fatigue</b> | <b>Outcome: fatigue at baseline</b>                                                                       | <b>Outcome: fatigue at baseline</b>                                                                                                                                                                                                                      | <b>Outcome: fatigue at baseline</b>                                                                                                                                                                                                                                                                                       |
|                                                                                               | <b>Independent variable:</b> cumulative number of life events,<br><b>Covariates:</b> gender, age          | <b>Independent variable:</b> cumulative number of life events,<br><b>Covariates:</b> gender, age, marital status, education level, family income, grades of employment, type of work, work hours per day, sleep quality and whether have illness         | <b>Independent variable:</b> cumulative number of life events,<br><b>Covariates:</b> gender, age, marital status, education level, family income, grades of employment, type of work, work hours per day, sleep quality, whether have illness, smoking, drinking and attending business dinner frequently or not.         |
| <b>b) the associations between cumulative severity score and self-reported fatigue</b>        | <b>Outcome: fatigue at baseline</b>                                                                       | <b>Outcome: fatigue at baseline</b>                                                                                                                                                                                                                      | <b>Outcome: fatigue at baseline</b>                                                                                                                                                                                                                                                                                       |
|                                                                                               | <b>Independent variable:</b> cumulative severity score of life events,<br><b>Covariates:</b> gender, age. | <b>Independent variable:</b> cumulative severity score of life events,<br><b>Covariates:</b> gender, age, marital status, education level, family income, grades of employment, type of work, work hours per day, sleep quality and whether have illness | <b>Independent variable:</b> cumulative severity score of life events,<br><b>Covariates:</b> gender, age, marital status, education level, family income, grades of employment, type of work, work hours per day, sleep quality, whether have illness, smoking, drinking and attending business dinner frequently or not. |
| <b>c) The associations between</b>                                                            | <b>Outcome: fatigue at follow-up</b>                                                                      | <b>Outcome: fatigue at follow-up</b>                                                                                                                                                                                                                     | <b>Outcome: fatigue at follow-up</b>                                                                                                                                                                                                                                                                                      |

|                                                                                            |                                                                                                                                                                                                                                                        |                                                                                                                                                                                                                                                                                                                                                                                                       |                                                                                                                                                                                                                                                                                                                                                                                                                                                                        |
|--------------------------------------------------------------------------------------------|--------------------------------------------------------------------------------------------------------------------------------------------------------------------------------------------------------------------------------------------------------|-------------------------------------------------------------------------------------------------------------------------------------------------------------------------------------------------------------------------------------------------------------------------------------------------------------------------------------------------------------------------------------------------------|------------------------------------------------------------------------------------------------------------------------------------------------------------------------------------------------------------------------------------------------------------------------------------------------------------------------------------------------------------------------------------------------------------------------------------------------------------------------|
| <b>cumulative number of life events and self-reported fatigue</b>                          | <b>Independent variable:</b> cumulative number of life events,<br><b>Covariates:</b> gender, age                                                                                                                                                       | <b>Independent variable:</b> cumulative number of life events,<br><b>Covariates:</b> gender, age, marital status, education level, family income, grades of employment, type of work, work hours per day, sleep quality and whether have illness                                                                                                                                                      | <b>Independent variable:</b> cumulative number of life events,<br><b>Covariates:</b> gender, age, marital status, education level, family income, grades of employment, type of work, work hours per day, sleep quality, whether have illness, smoking, drinking and attending business dinner frequently or not.                                                                                                                                                      |
| <b>d) the associations between cumulative severity score and self-reported fatigue</b>     | <b>Outcome: fatigue at follow-up</b>                                                                                                                                                                                                                   | <b>Outcome: fatigue at follow-up</b>                                                                                                                                                                                                                                                                                                                                                                  | <b>Outcome: fatigue at follow-up</b>                                                                                                                                                                                                                                                                                                                                                                                                                                   |
|                                                                                            | <b>Independent variable:</b> cumulative severity score of life events,<br><b>Covariates:</b> gender, age.                                                                                                                                              | <b>Independent variable:</b> cumulative severity score of life events,<br><b>Covariates:</b> gender, age, marital status, education level, family income, grades of employment, type of work, work hours per day, sleep quality and whether have illness                                                                                                                                              | <b>Independent variable:</b> cumulative severity score of life events,<br><b>Covariates:</b> gender, age, marital status, education level, family income, grades of employment, type of work, work hours per day, sleep quality, whether have illness, smoking, drinking and attending business dinner frequently or not.                                                                                                                                              |
| <b>e) the associations between different type of life events and self-reported fatigue</b> | <b>Outcome: fatigue at follow-up</b>                                                                                                                                                                                                                   | <b>Outcome: fatigue at follow-up</b>                                                                                                                                                                                                                                                                                                                                                                  | <b>Outcome: fatigue at follow-up</b>                                                                                                                                                                                                                                                                                                                                                                                                                                   |
|                                                                                            | <b>Independent variable:</b> negative life events; positive life events,<br><b>Covariates:</b> gender, age.                                                                                                                                            | <b>Independent variable:</b> negative life events; positive life events,<br><b>Covariates:</b> gender, age, marital status, education level, family income, grades of employment, type of work, work hours per day, sleep quality and whether have illness                                                                                                                                            | <b>Independent variable:</b> negative life events; positive life events,<br><b>Covariates:</b> gender, age, marital status, education level, family income, grades of employment, type of work, work hours per day, sleep quality, whether have illness, smoking, drinking and attending business dinner frequently or not.                                                                                                                                            |
| <b>f) the associations between specific life events and self-reported fatigue</b>          | <b>Outcome: fatigue at follow-up</b>                                                                                                                                                                                                                   | <b>Outcome: fatigue at follow-up</b>                                                                                                                                                                                                                                                                                                                                                                  | <b>Outcome: fatigue at follow-up</b>                                                                                                                                                                                                                                                                                                                                                                                                                                   |
|                                                                                            | <b>Independent variable:</b> Events related to family & marriage<br>Events related to work,<br>Events related to economic problems,<br>Events related to accidents and legal disputes,<br>Events related to health,<br><b>Covariates:</b> gender, age. | <b>Independent variable:</b> Events related to family & marriage<br>Events related to work,<br>Events related to economic problems,<br>Events related to accidents and legal disputes,<br>Events related to health,<br><b>Covariates:</b> gender, age, marital status, education level, family income, grades of employment, type of work, work hours per day, sleep quality and whether have illness | <b>Independent variable:</b> Events related to family & marriage<br>Events related to work,<br>Events related to economic problems,<br>Events related to accidents and legal disputes,<br>Events related to health,<br><b>Covariates:</b> gender, age, marital status, education level, family income, grades of employment, type of work, work hours per day, sleep quality, whether have illness, smoking, drinking and attending business dinner frequently or not. |

|                                                                                                 |                                                                                   |                                                                                                                                                                                                                                  |                                                                                                                                                                                                                                                                                                   |
|-------------------------------------------------------------------------------------------------|-----------------------------------------------------------------------------------|----------------------------------------------------------------------------------------------------------------------------------------------------------------------------------------------------------------------------------|---------------------------------------------------------------------------------------------------------------------------------------------------------------------------------------------------------------------------------------------------------------------------------------------------|
| g) the associations between specific life events (top 10 life events) and self-reported fatigue | <b>Outcome: fatigue at follow-up</b>                                              | <b>Outcome: fatigue at follow-up</b>                                                                                                                                                                                             | <b>Outcome: fatigue at follow-up</b>                                                                                                                                                                                                                                                              |
|                                                                                                 | <b>Independent variable:</b><br>48 life events<br><b>Covariates:</b> gender, age. | <b>Independent variable:</b><br>48 life events<br><b>Covariates:</b> gender, age, marital status, education level, family income, grades of employment, type of work, work hours per day, sleep quality and whether have illness | <b>Independent variable:</b><br>48 life events<br><b>Covariates:</b> gender, age, marital status, education level, family income, grades of employment, type of work, work hours per day, sleep quality, whether have illness, smoking, drinking and attending business dinner frequently or not. |
